# Supplementary material for: Fungal-specific IgG responses in allergic conjunctivitis: comparison with IgE and immunological implications
Source: PeerJ journal article supplement (doi:10.7717/peerj.20625), 2026-01-08
Supplement: CONSORTChecklist.pdf [file CONSORTChecklist.pdf]

# The CONSORT-PRO Reporting Guidance Checklist

| Section/Topic             | CONSORT-PRO Item | Recommended Content                                                                                                                                                                                 | Page Addressed |
|---------------------------|------------------|-----------------------------------------------------------------------------------------------------------------------------------------------------------------------------------------------------|----------------|
| <b>Title and Abstract</b> |                  |                                                                                                                                                                                                     |                |
|                           | P1b              | The PRO should be identified in the abstract as a primary or secondary outcome.                                                                                                                     | 1              |
| <b>Introduction</b>       |                  |                                                                                                                                                                                                     |                |
| Background and objectives | 2a               | The scientific background and explanation of rationale of PRO assessment should be included.                                                                                                        | 3              |
|                           | P2b              | The PRO hypothesis should be stated, and relevant domains identified, if applicable.                                                                                                                | 3              |
| <b>Methods</b>            |                  |                                                                                                                                                                                                     |                |
| Participants              | 4a               | PRO-specific criteria are required only if PROs were used for eligibility or stratification.                                                                                                        | 3              |
| Outcomes                  | P6a              | Evidence of PRO instrument validity and reliability should be provided or cited if available including the person completing the PRO and methods of data collection (paper, telephone, electronic). | 3-4            |
| Sample size               | 7a               | Sample size determination is required only if PRO is a primary study outcome.                                                                                                                       | 5              |
| <b>Randomization</b>      |                  |                                                                                                                                                                                                     |                |
| Statistical methods       | P12a             | Statistical approaches for dealing with missing data are explicitly stated.                                                                                                                         | 5              |
| <b>Results</b>            |                  |                                                                                                                                                                                                     |                |
| Participant flow          | 13a              | The number of PRO outcome data at baseline and at subsequent time points should be transparent.                                                                                                     | 6-8            |
| Baseline data             | 15               | PRO data in the table showing baseline demographic and clinical characteristics for each group should be included.                                                                                  | 6-8            |
| Numbers analyzed          | 16               | For each group, the number of participants (denominator) included in each analysis and whether the analysis was by original assigned groups) is required for PRO results.                           | 6-8            |
| Outcomes and estimation   | 17a              | The estimated effect size and its precision such as 95% confidence interval should be presented for multidimensional PROs from each domain and time point.                                          | 6-8            |
| Ancillary analyses        | 18               | Results of any other PRO analyses performed, including subgroup analyses and adjusted analyses, distinguishing pre-specified from exploratory should be presented, where relevant.                  | 6-8            |
| <b>Discussion</b>         |                  |                                                                                                                                                                                                     |                |
| Limitation                | P20/21           | PRO-specific limitations and implications for generalizability and clinical practice should be presented.                                                                                           | 11             |
| Interpretation            | 22               | PRO data should be interpreted in relation to clinical outcomes including survival data, where relevant.                                                                                            | 11             |

Calvert M, Blazeby J, Altman DG, et al. Reporting of patient-reported outcomes in randomized trials: the CONSORT PRO extension. *JAMA*. 2013;309(8):814-822.  
doi:10.1001/jama.2013.879

Note: The CONSORT-PRO Extension should be used with the CONSORT 2010 Statement and any other relevant CONSORT Extensions, found at [consort-statement.org](http://consort-statement.org)
