# Supplementary material for: Fungal-specific IgG responses in allergic conjunctivitis: comparison with IgE and immunological implications
Source: PeerJ journal article supplement (doi:10.7717/peerj.20625), 2026-01-08

2018年 1月 12日

日本眼科アレルギー学会 ご担当者 様

三村 達哉

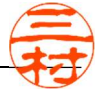

## 使用許諾のお願い

拝啓 時下ますますご清栄のこととお慶び申し上げます。

さて、貴著作物を利用させていただきたくお願い申し上げます。お手数ですが、下記内容のご確認をいただき、承認欄にご記入のうえご返送いただければ幸いです。

敬具

記

○転載許可をお願いする図表

著 者 名 : アレルギー性結膜疾患診療ガイドライン編集委員会

論 文 名 : アレルギー性結膜疾患診療ガイドライン JACQLQ

雑誌（書籍）名 : 日眼会誌

発行所 公益財団法人日本眼科学会

2018年 1月18日

上記の使用を許可する。

ご芳名 日本眼科アレルギー学会

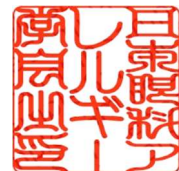

Supplement: JACQLQ_Permission_Japanese.pdf [file JACQLQ_Permission_Japanese.pdf]
